# Supplementary material for: Visual and near IR (NIR) fluorescence detection of Cr3+in aqueous media via spirobenzopyran ring opening with application in logic gate and bio-imaging
Source: Royal Society of Chemistry journal article supplement (doi:10.1039/c3dt51851e), 2013-09-17
Supplement: c3dt51851e.pdf [file c3dt51851e.pdf]

## Supporting Information

# **Visual and Near IR (NIR) Fluorescence detection of Cr<sup>3+</sup> in Aqueous Media via Spirobenzopyran ring opening with Application in Logic gate and Bio-imaging**

*Shyamaprosad Goswami<sup>a\*</sup>, Avijit Kumar Das<sup>a</sup>, Anup Kumar Maity<sup>b</sup>, Abhishek Manna<sup>a</sup>,  
Krishnendu Aich<sup>a</sup>, Sibaprasad Maity<sup>a,c</sup>, Partha Saha<sup>b</sup>, Tarun Kanti Mandal<sup>c</sup>*

<sup>a</sup>*Department of Chemistry, Bengal Engineering and Science University, Shibpur, Howrah 711103, West Bengal, India E-mail: [spgoswamical@yahoo.com](mailto:spgoswamical@yahoo.com); Fax: +91-3326682916.*

<sup>b</sup>*Crystallography and Molecular Biology Division, Saha Institute of Nuclear Physics, Kolkata 700064, West Bengal, India E-mail: [partha.saha@saha.ac.in](mailto:partha.saha@saha.ac.in)*

<sup>c</sup>*Haldia Institute of Technology, Hatiberia, Haldia, West Bengal-721657*

## CONTENTS

|                                                                                          |              |
|------------------------------------------------------------------------------------------|--------------|
| <b>1. General procedure for drawing Job plot by UV-vis method.....</b>                   | <b>2</b>     |
| <b>2. Association constant determination by Uv-vis methods.....</b>                      | <b>2</b>     |
| <b>3. Association constant determination by Fluorescence methods.....</b>                | <b>3</b>     |
| <b>4. Determination of fluorescence quantum yield.....</b>                               | <b>3</b>     |
| <b>5. Calculation of the detection limit.....</b>                                        | <b>4</b>     |
| <b>6. <sup>1</sup>H NMR spectrum (S4) of compound A .....</b>                            | <b>5</b>     |
| <b>7. Mass spectrum (S5) of compound A.....</b>                                          | <b>6</b>     |
| <b>8. <sup>1</sup>H NMR spectrum (S6) of SPNH.....</b>                                   | <b>7</b>     |
| <b>9. <sup>13</sup>C NMR spectrum(S7)of SPNH.....</b>                                    | <b>8</b>     |
| <b>10. Mass spectrum (S8) of SPNH.....</b>                                               | <b>9</b>     |
| <b>11. Mass spectrum(S9)of SPNH + Cr<sup>3+</sup> complex.....</b>                       | <b>10</b>    |
| <b>12. UV-vis absorption spectra of SPNH (S10) with different cation .....</b>           | <b>11-13</b> |
| <b>13. Fluorescence titration spectra (S11) of SPNH with different guest cations ...</b> | <b>14-16</b> |
| <b>14. Theoretical Study.....</b>                                                        | <b>16-22</b> |

### 1. General procedure for drawing Job plot by UV-vis method:

Stock solution of same concentration of **SPNH** and  $\text{Cr}^{3+}$  were prepared in the order of  $\approx 2.0 \times 10^{-5}$  M in  $\text{CH}_3\text{CN}$ -HEPES buffer (7/3,v/v, 25°C) at pH 7.4. The absorbance in each case with different *host-guest* ratio but equal in volume was recorded. Job plots were drawn by plotting  $\Delta I \cdot X_{\text{host}}$  vs  $X_{\text{host}}$  ( $\Delta I$  = change of intensity of the absorbance spectrum during titration and  $X_{\text{host}}$  is the mole fraction of the host in each case, respectively).

### 2. Association constant determination by Uv-vis methods:

Binding constant was calculated according to the Benesi-Hildebrand equation<sup>1</sup>.  $K_a$  was calculated following the equation stated below.

$$1/(A-A_0) = 1/\{K(A_{\text{max}}-A_0) [M]_n\} + 1/[A_{\text{max}}-A_0]$$

Here  $A_0$  is the absorbance of receptor in the absence of guest,  $A$  is the absorbance recorded in the presence of added guest,  $A_{\text{max}}$  is absorbance in presence of added  $[M]_{\text{max}}$  and  $K$  is the association constant ( $\text{M}^{-1}$ ). The association constant ( $K$ ) could be determined from the slope of the straight line of the plot of  $1/(A-A_0)$  against  $1/[M]_n$ . The association constant ( $K_a$ ) as determined by UV-vis titration method for sensor with  $\text{Cr}^{3+}$  is found to be  $2.2 \times 10^4 \text{ M}^{-1}$ .

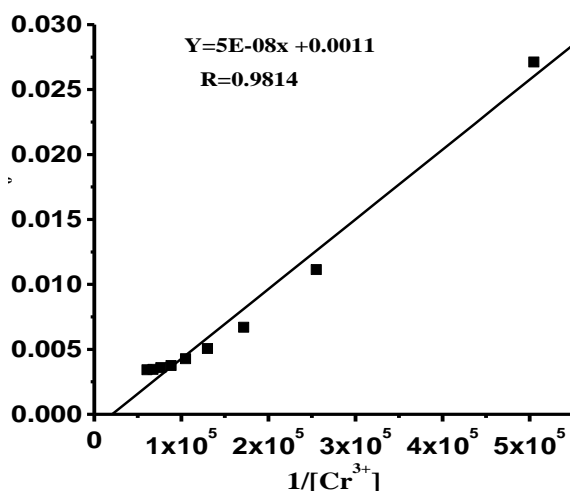

**Figure S1:** Benesi-Hildebrand plot from UV-vis titration data of **SPNH** ( $c = 1 \times 10^{-5}$  M) with  $\text{Cr}^{3+}$  ( $c = 2 \times 10^{-4}$  M).

### 3. Association constant determination by Fluorescence methods:

The binding constant value of  $\text{Cr}^{3+}$  with **SPNH** has been determined from the emission intensity data following the modified Benesi–Hildebrand equation,  $1/\Delta I = 1/\Delta I_{\text{max}} + (1/K[C]) (1/\Delta I_{\text{max}})$ . Here  $\Delta I = I - I_{\text{min}}$  and  $\Delta I_{\text{max}} = I_{\text{max}} - I_{\text{min}}$ , where  $I_{\text{min}}$ ,  $I$ , and  $I_{\text{max}}$  are the emission intensities of sensor considered in the absence of  $\text{Cr}^{3+}$ , at an intermediate  $\text{Cr}^{3+}$  concentration, and at a concentration of complete saturation where  $K$  is the binding constant and  $[C]$  is the  $\text{Cr}^{3+}$  concentration, respectively. From the plot of  $1/(I - I_{\text{min}})$  against  $[C]^{-1}$  for sensor, the value of  $K$  has been determined from the slope. The association constant ( $K_a$ ) as determined by fluorescence titration method for sensor with  $\text{Cr}^{3+}$  is found to be  $7.7 \times 10^4 \text{ M}^{-1}$  (error < 10%).

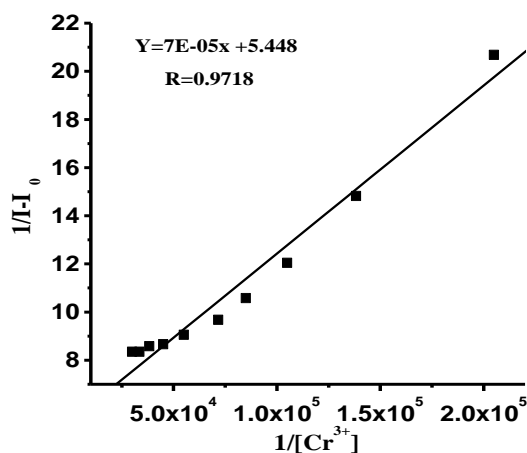

**Figure S2:** Benesi–Hildebrand plot from fluorescence titration data of **SPNH** ( $c = 1 \times 10^{-5} \text{ M}$ ) with  $\text{Cr}^{3+}$  ( $c = 2 \times 10^{-4} \text{ M}$ ).

### 4. Determination of fluorescence quantum yield:

Here, the quantum yield  $\phi$  was measured by using the following equation,

$$\phi_x = \phi_s \left( \frac{F_x}{F_s} \right) \left( \frac{A_s}{A_x} \right) \left( \frac{n_x^2}{n_s^2} \right)$$

Where,

X & S indicate the unknown and standard solution respectively,  $\phi$  = quantum yield,

F = area under the emission curve, A = absorbance at the excitation wave length,

n = index of refraction of the solvent. Here  $\phi$  measurements were performed using rhodamine-B in ethanol as standard [ $\phi = 0.65$ ] (error ~ 10%).

### 5. Calculation of the detection limit:

The detection limit (DL) of **SPNH** in absorption and emission spectra for  $\text{Cr}^{3+}$  was determined from the following equation:

$$\text{DL} = K * \text{Sb1}/S$$

Where  $K = 2$  or  $3$  (we take  $3$  in this case);  $\text{Sb1}$  is the standard deviation of the blank solution;  $S$  is the slope of the calibration curve.

From the graph Fig.S3(a), we get slope =  $0.0059$ , and  $\text{Sb1}$  value is  $0.011985$ .

Thus using the formula we get the Detection Limit for  $\text{Cr}^{3+} = 6.09 \mu\text{M}$  in Uv-vis absorption spectra.

From the graph Fig.S3(b), we get slope =  $18.034$ , and  $\text{Sb1}$  value is  $27.6788$ .

Thus using the formula we get the Detection Limit for  $\text{Cr}^{3+}$  is  $4.6 \mu\text{M}$  in Fluorescence spectra.

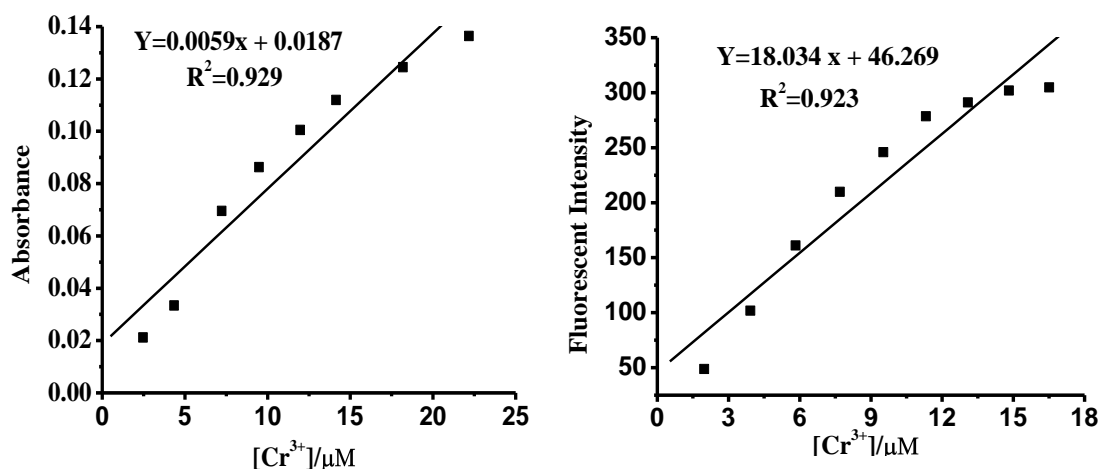

**Figure S3 (a)** Changes of absorbance of **SPNH** ( $c = 1 \times 10^{-5} \text{M}$ ) as a function of  $\text{Cr}^{3+}$  ( $c = 2 \times 10^{-4} \text{M}$ ) at  $440 \text{ nm}$ . **(b)** Changes of Fluorescence Intensity of **SPNH** ( $c = 1 \times 10^{-5} \text{M}$ ) as a function of  $\text{Cr}^{3+}$  ( $c = 2 \times 10^{-4} \text{M}$ ) at  $675 \text{ nm}$ .

### 6. $^1\text{H}$ NMR spectrum (S4) of compound A:

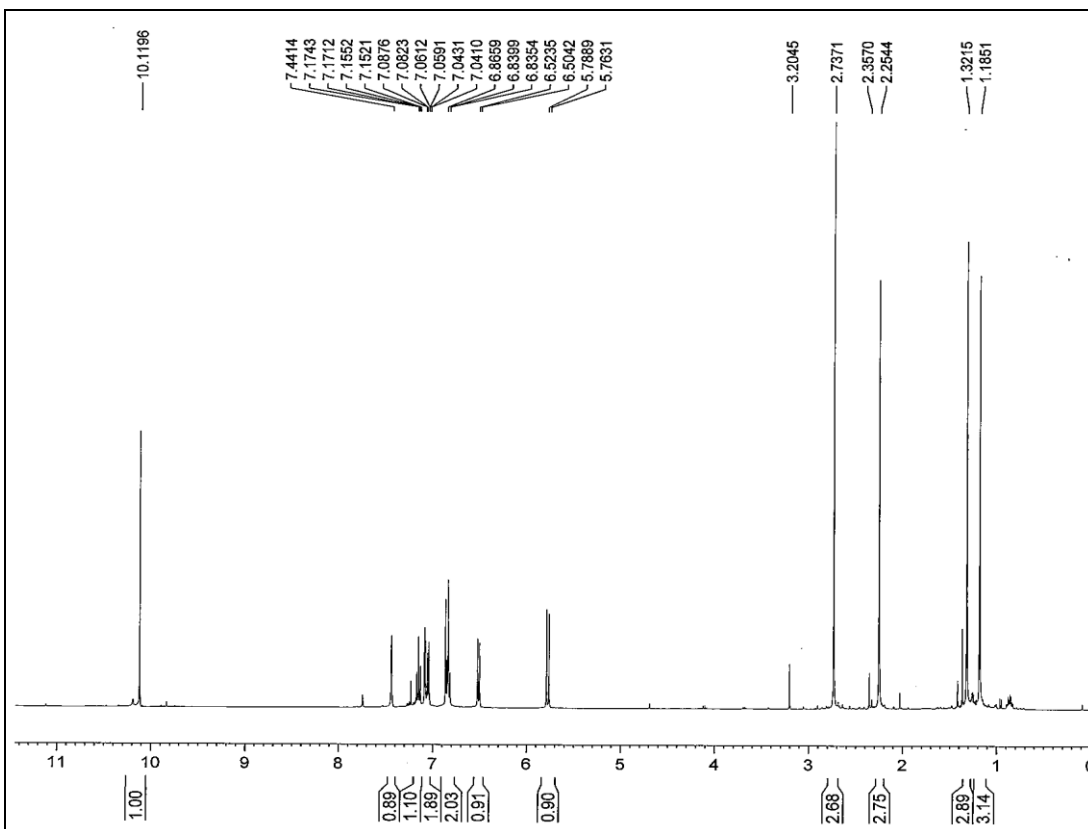

## 7. Mass spectrum (S5) of compound A:

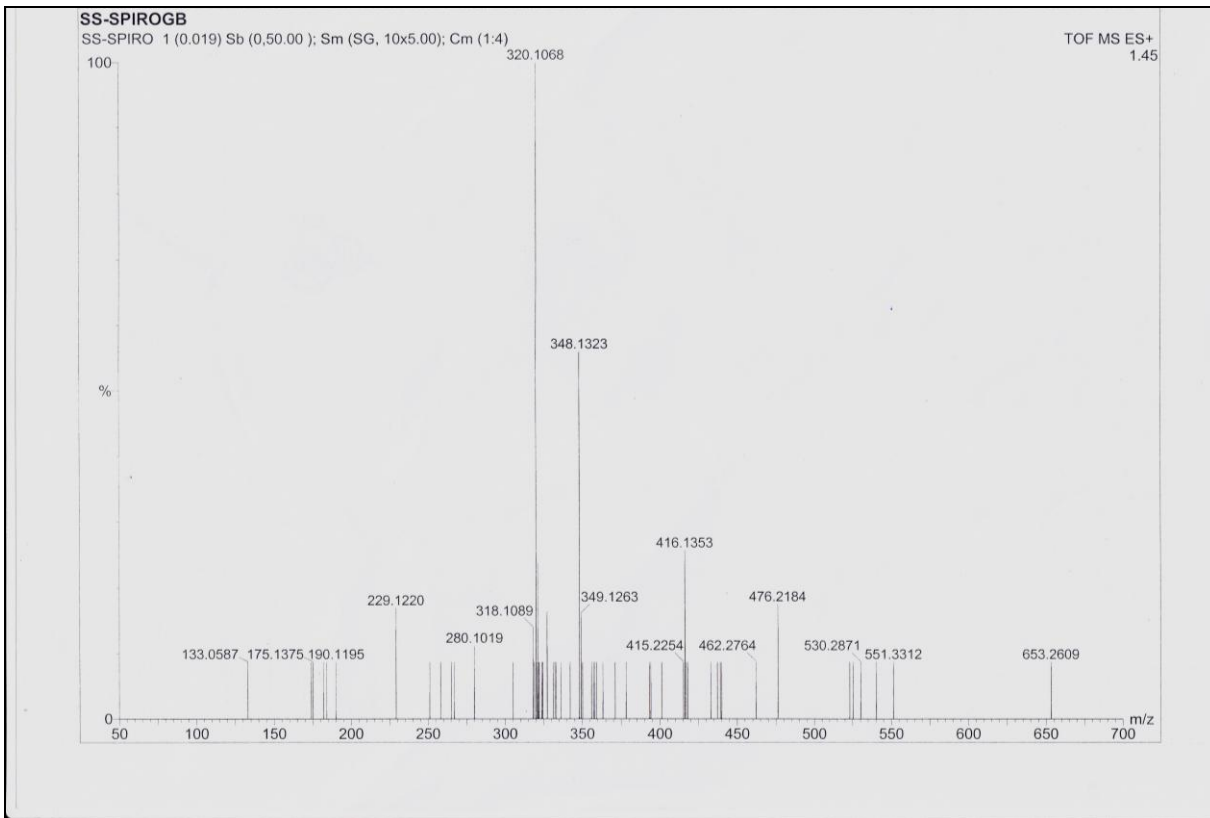

### 8. $^1\text{H}$ NMR spectrum (S6) of SPNH:

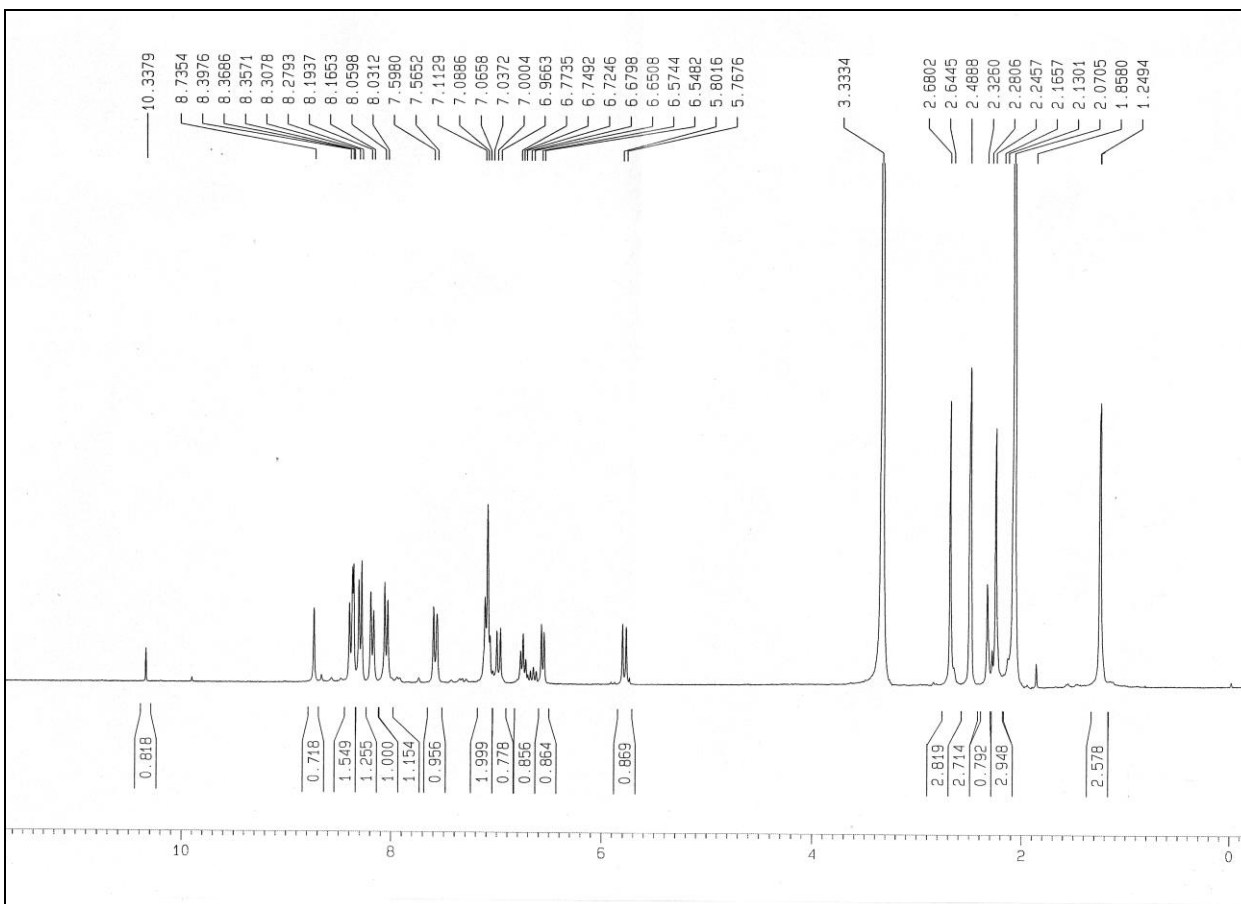

9.  $^{13}\text{C}$  NMR spectrum(S7) of SPNH:

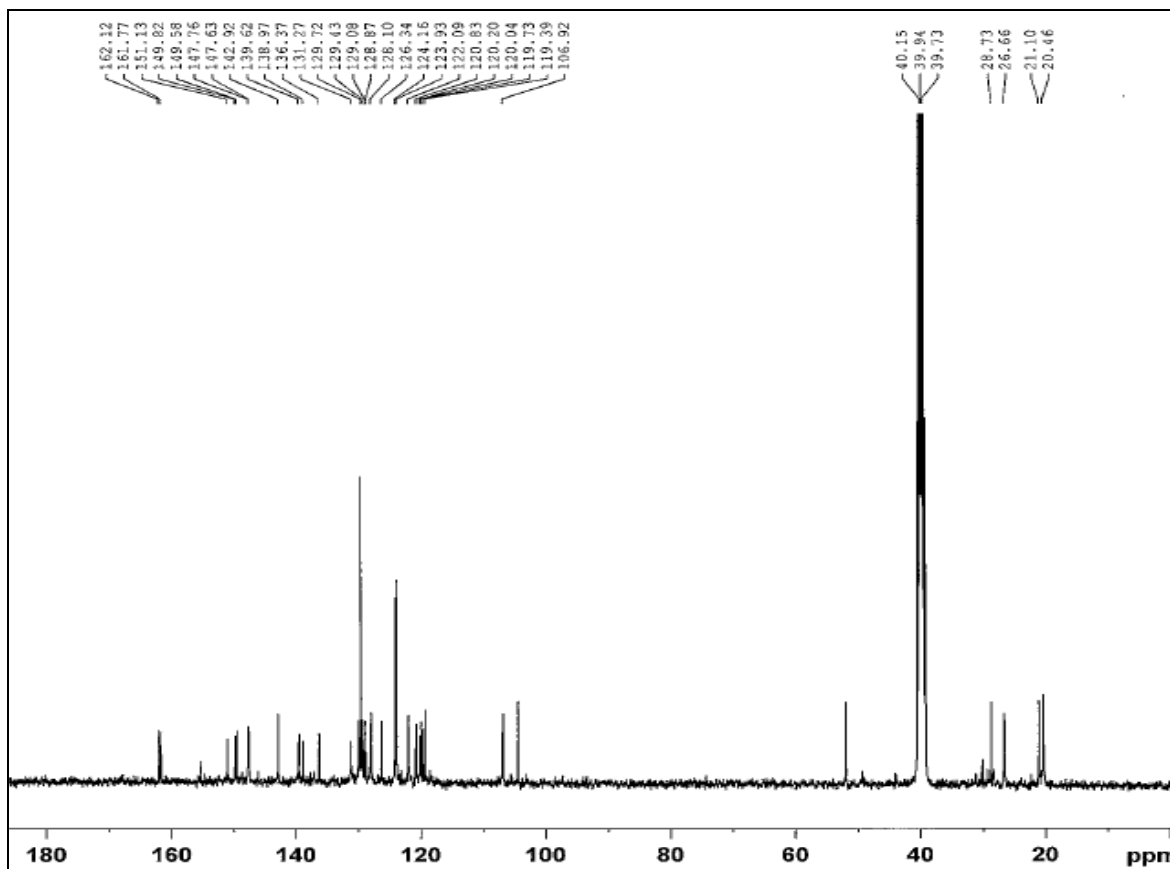



### 10. Mass spectrum (S8) of Sensor SPNH:

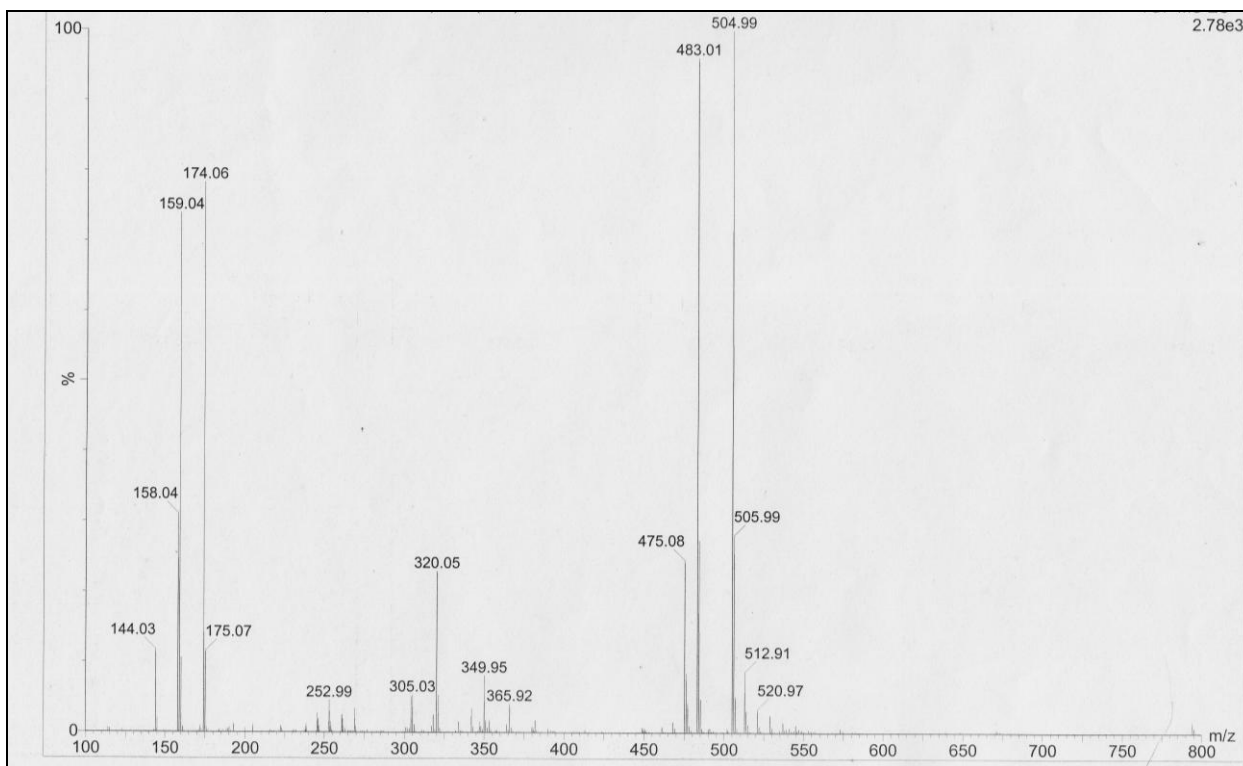

### 11. Mass spectrum(S9) of SPNH-Cr<sup>3+</sup> complex:

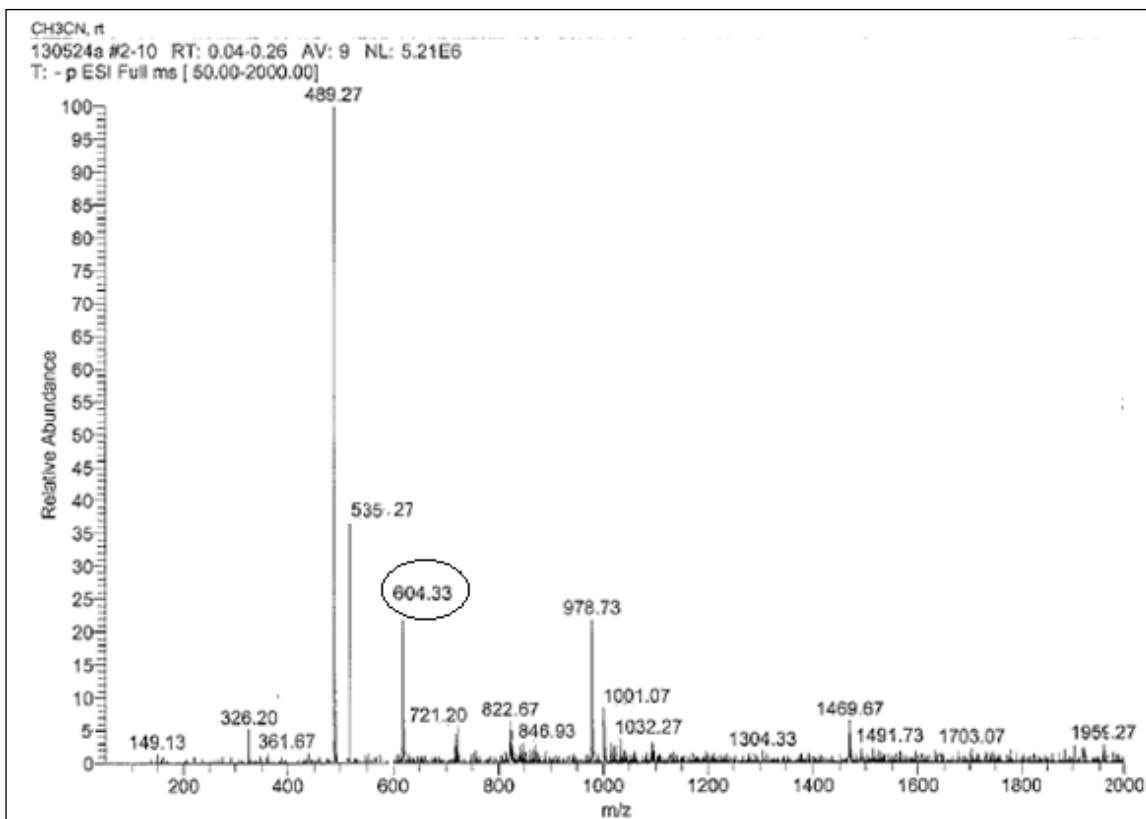

12. UV-vis absorption spectra of SPNH (S10)( $c = 1 \times 10^{-5} \text{M}$ ) with different cations ( $c = 2 \times 10^{-4} \text{M}$ ) in  $\text{CH}_3\text{CN}$ -HEPES buffer solution (7/3, v/v,  $25^\circ\text{C}$ ) at pH-7.4 :

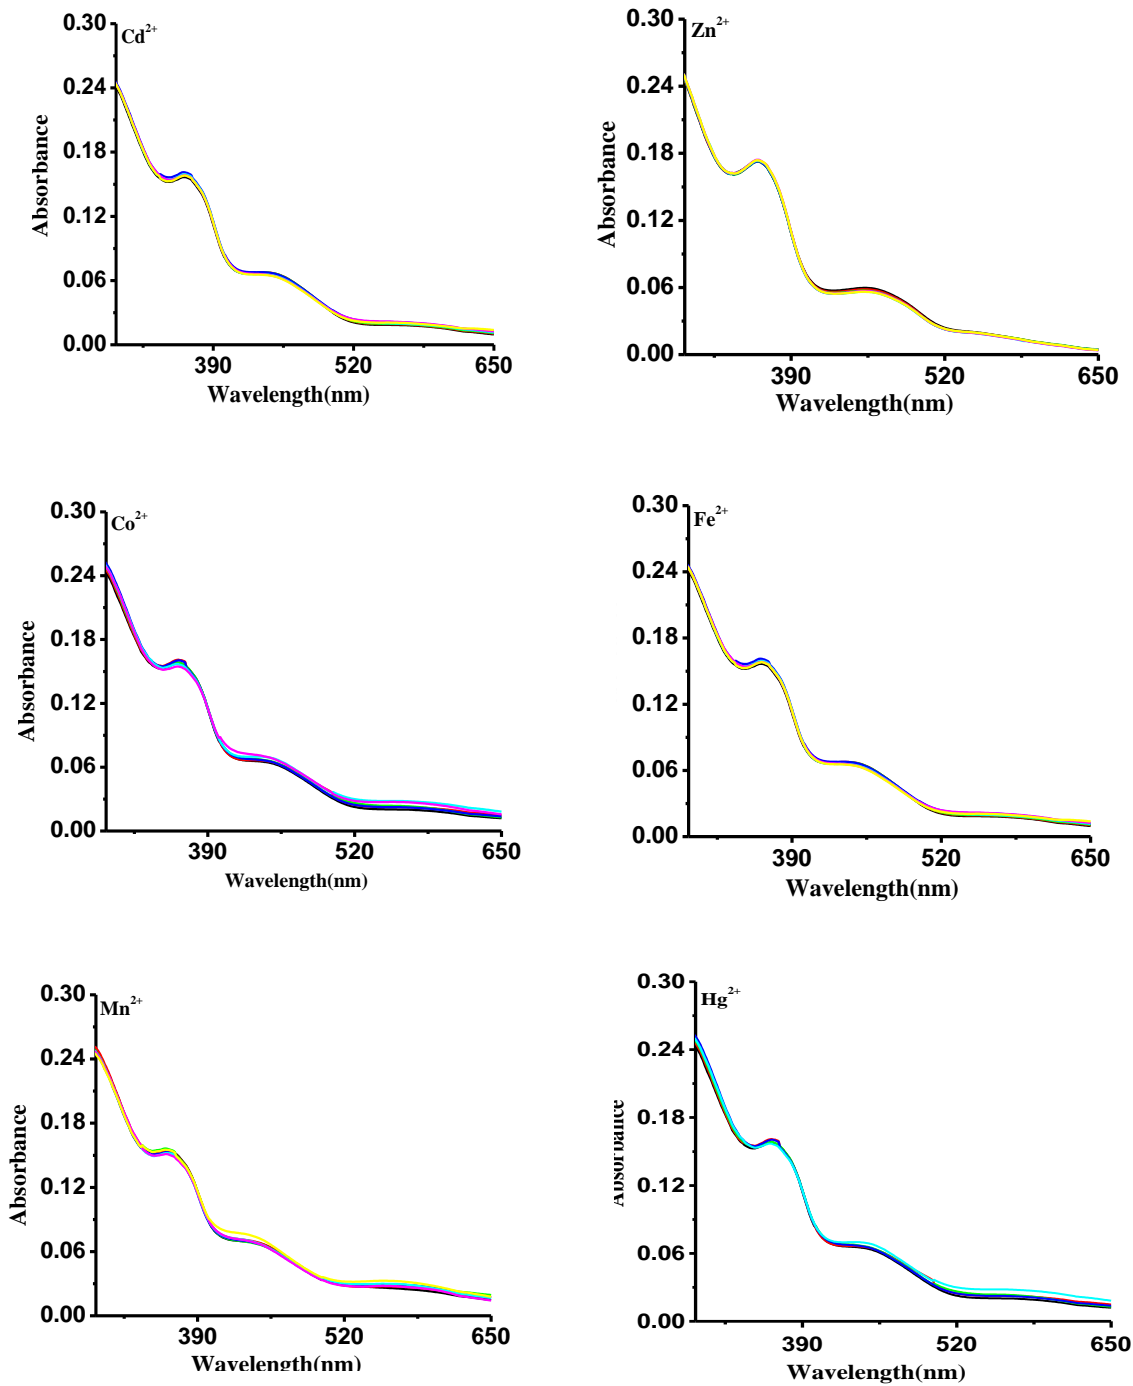

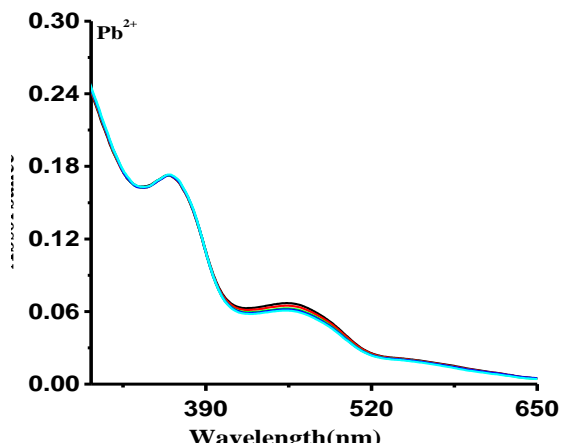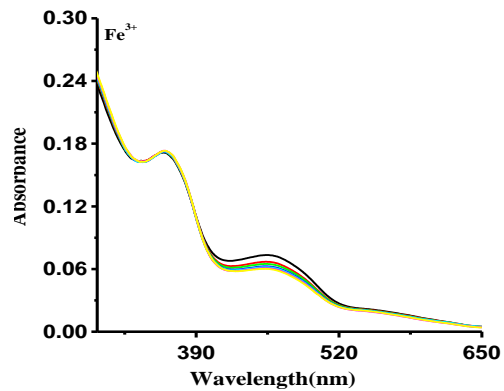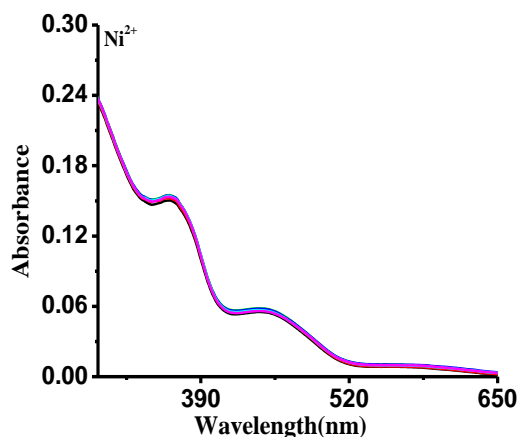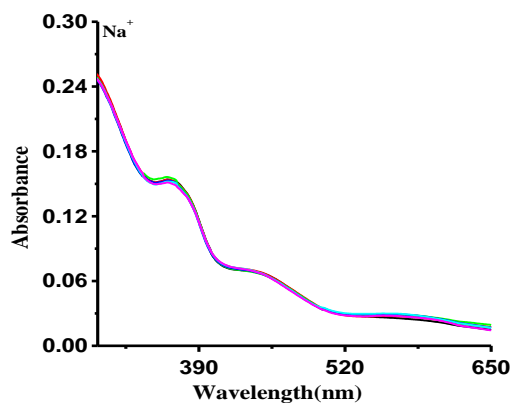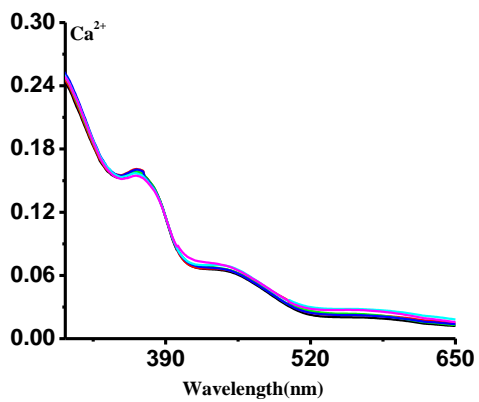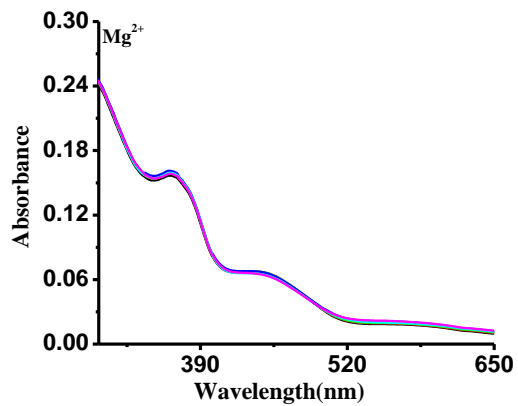

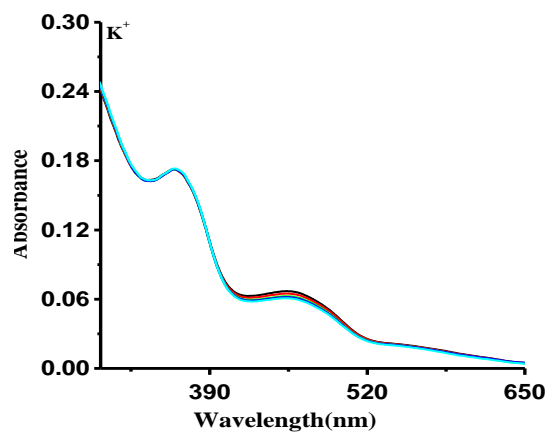

**13. Fluorescence titration spectra (S11) of receptor ( $c = 1 \times 10^{-5}$  M) with different guest cations ( $c = 2 \times 10^{-4}$  M) in  $\text{CH}_3\text{CN}$ -HEPES buffer solution (7/3, v/v,  $25^\circ\text{C}$ ) at pH-7.4 :**

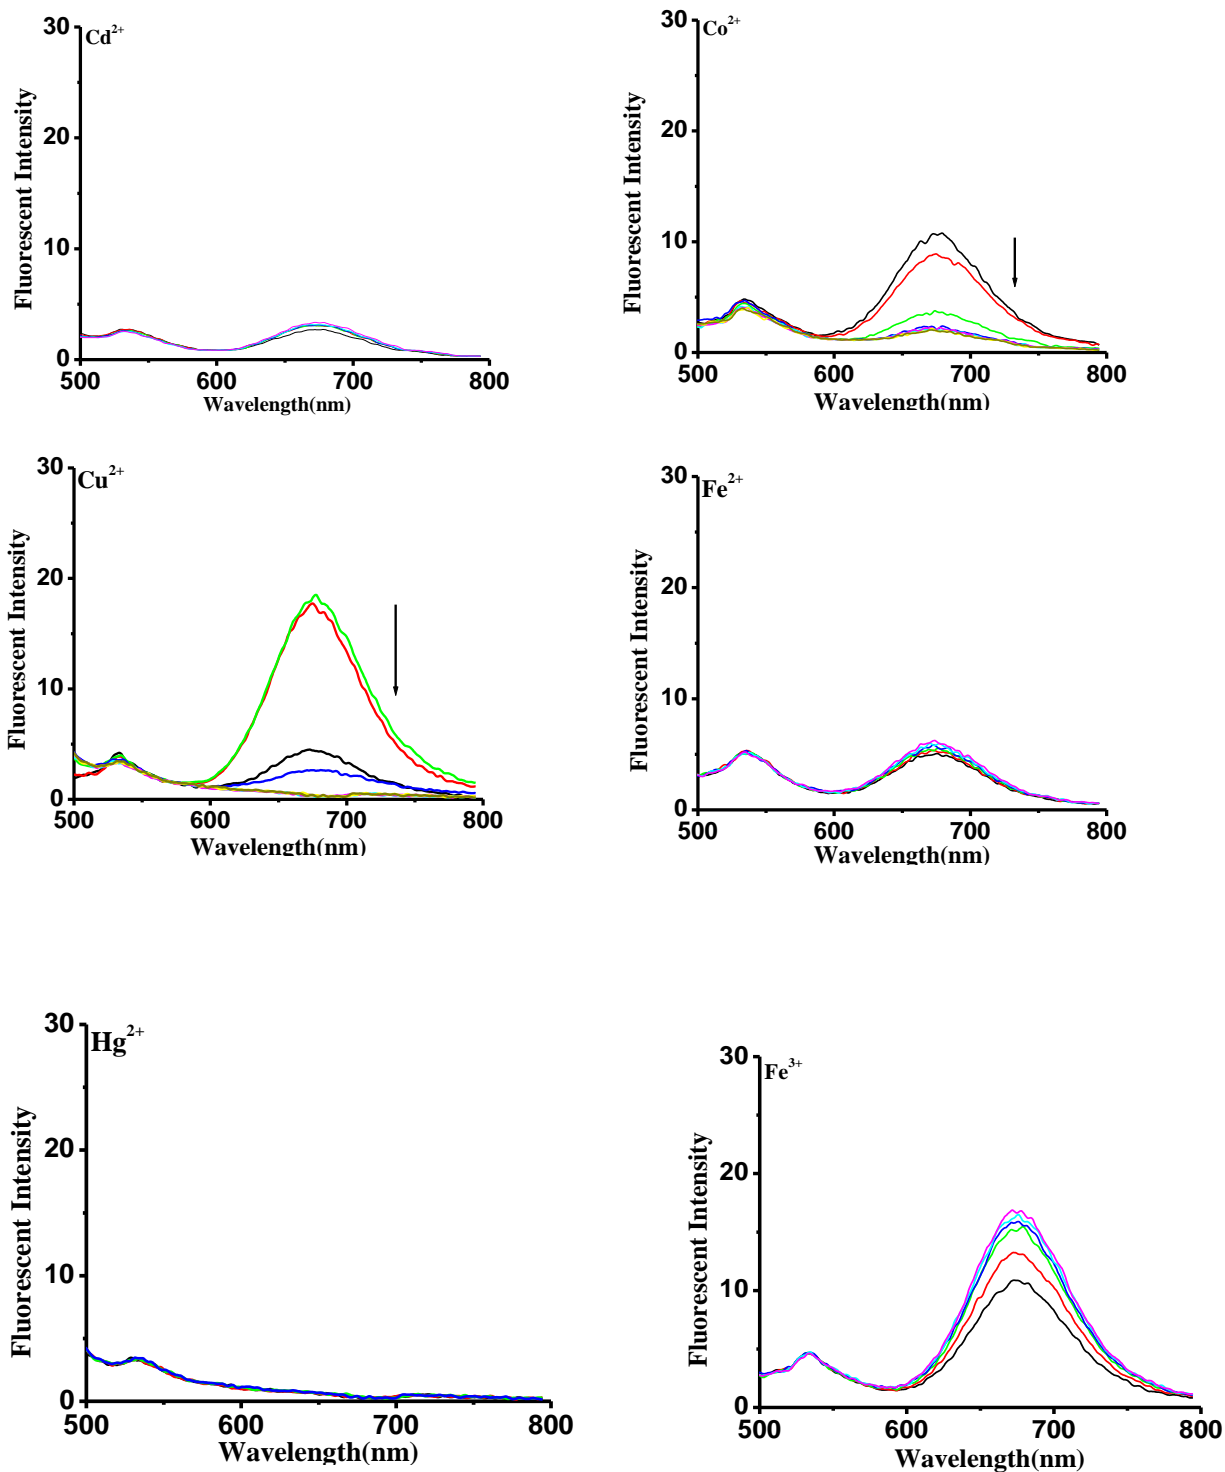

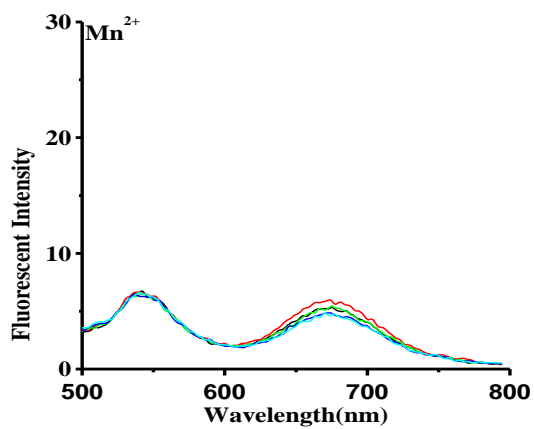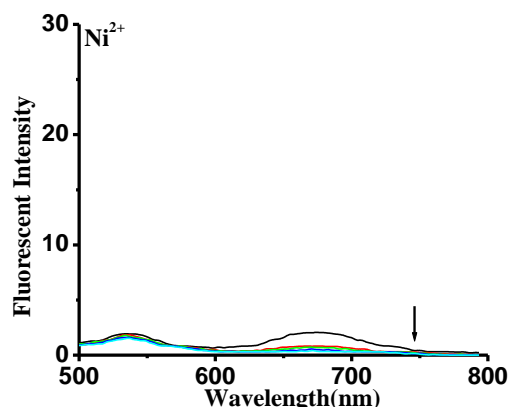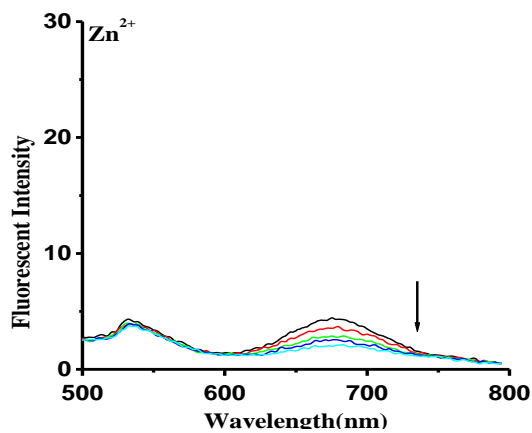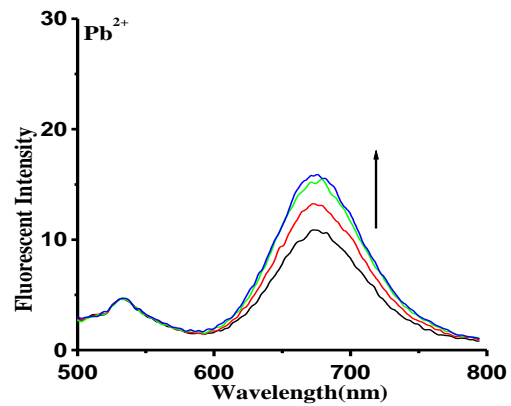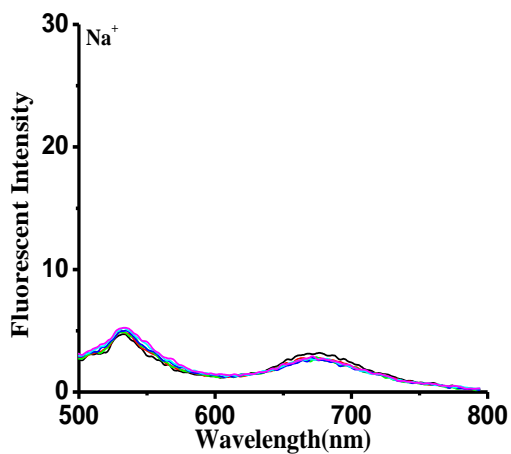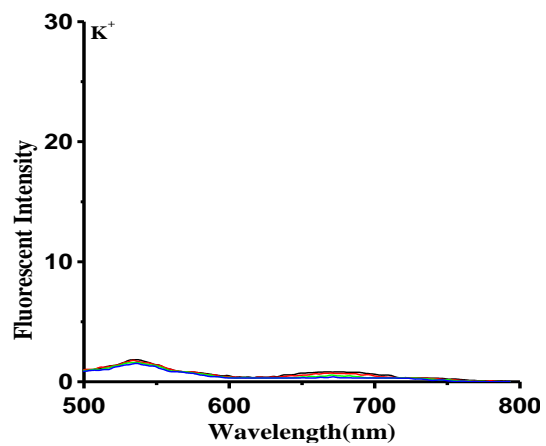

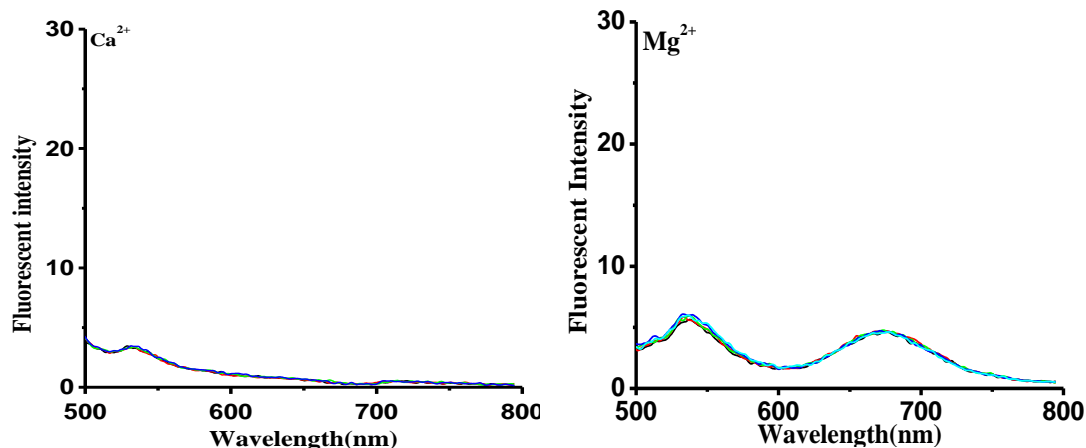

#### 14. Theoretical calculation.

##### Computational Study:

The ground state geometry of **SPNH** and its Cr-complex were optimized using Density Functional Theory (DFT). The B3LYP functional and 6-31G basis set used for all atoms. The calculation of absorption and emission were performed using Time Dependent Density Functional Theory (TD-DFT). The energy difference between the optimized geometry at the excited state which gives the  $\lambda_{\text{max}}$  and the ground state was used in computing emission. The first excited state of the **SPNH** and the Cr-complex did not match the observed  $\lambda_{\text{max}}$ , so other excited state was used to calculate the emission. All the computation in acetonitrile solvent was carried out using Polarizable Continuum Model (PCM). All these computational work were carried out using Gaussian 09 program.

The experimentally observed absorption peak ( $\lambda_{\text{max}}$ ) at 373 nm for **SPNH** is in good agreement with the theoretically calculated value of 400 nm in gas phase and 351 nm in acetonitrile medium (table -2). Whereas for **SPNH-Cr** complex the calculated absorption at 444 nm and 448 nm in gas phase and acetonitrile medium respectively are more excitingly supports our experimentally observed absorption of 440 nm. In emission spectrum, **SPNH** shows the emission ( $\lambda_{\text{max}}$ ) at 675 nm which is in accord with the theoretically calculated 694 nm in gas phase and 657 in acetonitrile medium. For **SPNH-Cr** complex also we studied emission nature but we got a characteristic peak at 640 nm with low intensity. Using 6-31+G (d,p) we studied, too



which results the absorption peak at 349 nm in acetonitrile which is very close to our calculated data using 6-31G.

### Cartesian Coordinates 1. SPNH (Solvent Phase).

#### B3LYP optimized structure (Hydrogen atom is removed for clarity)

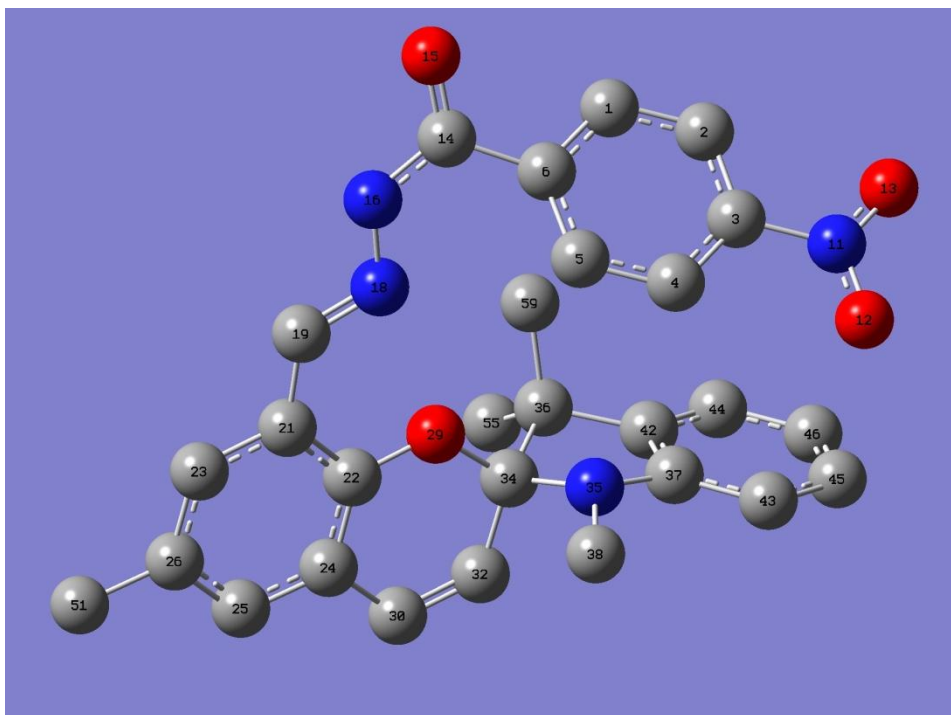

Energy(B3LYP)= -1602.5317702 a.u

| Center Number | Atomic Number | Atomic Type |           | Coordinates (Angstroms) |           |   |
|---------------|---------------|-------------|-----------|-------------------------|-----------|---|
|               |               |             |           | X                       | Y         | Z |
| 1             | 6             | 0           | -2.705363 | 3.017094                | 1.012498  |   |
| 2             | 6             | 0           | -3.763924 | 2.214381                | 0.599554  |   |
| 3             | 6             | 0           | -3.650900 | 1.540227                | -0.617980 |   |
| 4             | 6             | 0           | -2.513721 | 1.638256                | -1.420822 |   |
| 5             | 6             | 0           | -1.450230 | 2.422169                | -0.980703 |   |
| 6             | 6             | 0           | -1.540939 | 3.116169                | 0.235035  |   |
| 7             | 1             | 0           | -2.776742 | 3.570886                | 1.941667  |   |
| 8             | 1             | 0           | -4.660921 | 2.116948                | 1.197262  |   |
| 9             | 1             | 0           | -2.464939 | 1.109915                | -2.364059 |   |
| 10            | 1             | 0           | -0.558694 | 2.499932                | -1.590207 |   |
| 11            | 7             | 0           | -4.769310 | 0.704950                | -1.071889 |   |
| 12            | 8             | 0           | -4.674975 | 0.147434                | -2.169296 |   |
| 13            | 8             | 0           | -5.754602 | 0.597971                | -0.335310 |   |
| 14            | 6             | 0           | -0.483250 | 4.077938                | 0.692814  |   |

|    |   |   |           |           |           |
|----|---|---|-----------|-----------|-----------|
| 15 | 8 | 0 | -0.795611 | 5.184816  | 1.150302  |
| 16 | 7 | 0 | 0.834828  | 3.745002  | 0.571477  |
| 17 | 1 | 0 | 1.492416  | 4.478114  | 0.841294  |
| 18 | 7 | 0 | 1.297892  | 2.485178  | 0.281049  |
| 19 | 6 | 0 | 2.581722  | 2.386843  | 0.219325  |
| 20 | 1 | 0 | 3.201180  | 3.279975  | 0.367718  |
| 21 | 6 | 0 | 3.348443  | 1.173828  | -0.062001 |
| 22 | 6 | 0 | 2.853596  | -0.152514 | -0.075291 |
| 23 | 6 | 0 | 4.721475  | 1.368651  | -0.324284 |
| 24 | 6 | 0 | 3.720365  | -1.221647 | -0.367073 |
| 25 | 6 | 0 | 5.072229  | -0.970569 | -0.642212 |
| 26 | 6 | 0 | 5.599640  | 0.323588  | -0.622992 |
| 27 | 1 | 0 | 5.103562  | 2.386496  | -0.297466 |
| 28 | 1 | 0 | 5.717875  | -1.815823 | -0.868993 |
| 29 | 8 | 0 | 1.541421  | -0.355563 | 0.223810  |
| 30 | 6 | 0 | 3.159997  | -2.564231 | -0.370277 |
| 31 | 1 | 0 | 3.815712  | -3.397679 | -0.608662 |
| 32 | 6 | 0 | 1.866613  | -2.767377 | -0.087361 |
| 33 | 1 | 0 | 1.437426  | -3.764512 | -0.099721 |
| 34 | 6 | 0 | 0.900727  | -1.648434 | 0.200117  |
| 35 | 7 | 0 | -0.157399 | -1.609915 | -0.832551 |
| 36 | 6 | 0 | 0.071996  | -1.867469 | 1.539929  |
| 37 | 6 | 0 | -1.217521 | -2.404297 | -0.395058 |
| 38 | 6 | 0 | 0.203151  | -1.545965 | -2.240954 |
| 39 | 1 | 0 | 0.495173  | -2.521667 | -2.656623 |
| 40 | 1 | 0 | -0.645006 | -1.163078 | -2.814846 |
| 41 | 1 | 0 | 1.031363  | -0.846159 | -2.366562 |
| 42 | 6 | 0 | -1.131696 | -2.622603 | 0.993935  |
| 43 | 6 | 0 | -2.263199 | -2.948399 | -1.146713 |
| 44 | 6 | 0 | -2.102622 | -3.368370 | 1.645869  |
| 45 | 6 | 0 | -3.238982 | -3.702239 | -0.474103 |
| 46 | 6 | 0 | -3.166862 | -3.916992 | 0.904790  |
| 47 | 1 | 0 | -2.328125 | -2.797643 | -2.219274 |
| 48 | 1 | 0 | -4.058858 | -4.131118 | -1.043809 |
| 49 | 1 | 0 | -3.926193 | -4.510943 | 1.404363  |
| 50 | 1 | 0 | -2.043007 | -3.536874 | 2.718096  |
| 51 | 6 | 0 | 7.060531  | 0.589803  | -0.907550 |

**Cartesian Coordinates 2. SPNH –Cr complex (Solvent Phase).**

**B3LYP optimized structure(Hydrogen atom is removed for clarity)**

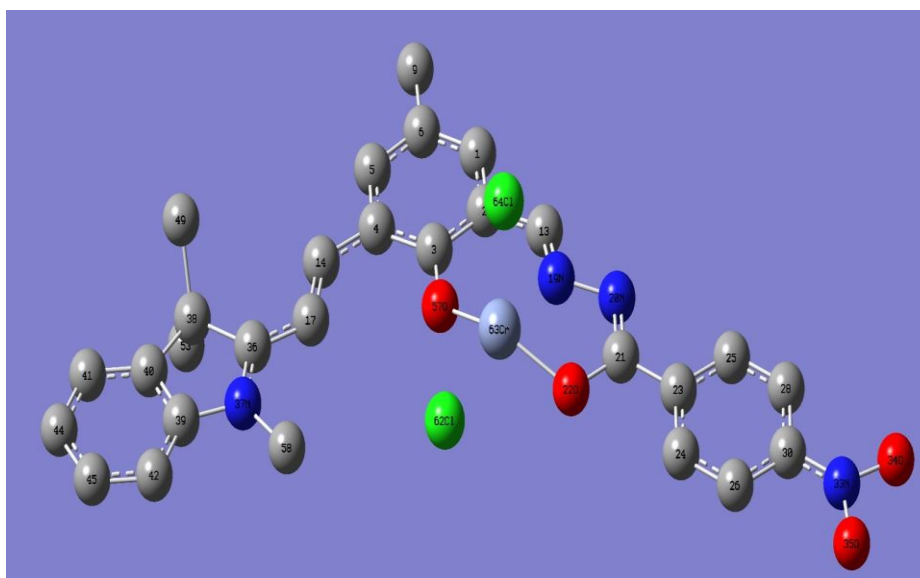

**Energy(B3LYP)= -3566.370858 a.u**

| Center Number | Atomic Number | Atomic Type | Coordinates (Angstroms)       |
|---------------|---------------|-------------|-------------------------------|
|               |               |             | X Y Z                         |
| 1             | 6             | 0           | -0.075190 4.472122 -0.226522  |
| 2             | 6             | 0           | 0.292225 3.114182 -0.149763   |
| 3             | 6             | 0           | -0.715108 2.107266 -0.150340  |
| 4             | 6             | 0           | -2.086577 2.495706 -0.211406  |
| 5             | 6             | 0           | -2.389842 3.879798 -0.269790  |
| 6             | 6             | 0           | -1.413756 4.878801 -0.280246  |
| 7             | 1             | 0           | 0.712835 5.219566 -0.242627   |
| 8             | 1             | 0           | -3.435663 4.169173 -0.313309  |
| 9             | 6             | 0           | -1.781813 6.343684 -0.342636  |
| 10            | 1             | 0           | -2.854712 6.475698 -0.508404  |
| 11            | 1             | 0           | -1.521738 6.858670 0.590387   |
| 12            | 1             | 0           | -1.248885 6.853699 -1.153207  |
| 13            | 6             | 0           | 1.695866 2.787941 -0.122267   |
| 14            | 6             | 0           | -3.217091 1.593711 -0.219720  |
| 15            | 1             | 0           | 2.417072 3.588113 -0.269342   |
| 16            | 1             | 0           | -4.162254 2.121850 -0.258848  |
| 17            | 6             | 0           | -3.250297 0.222696 -0.189644  |
| 18            | 1             | 0           | -2.312244 -0.313254 -0.156611 |
| 19            | 7             | 0           | 2.151314 1.572880 0.037342    |
| 20            | 7             | 0           | 3.552644 1.415254 -0.075592   |
| 21            | 6             | 0           | 3.829358 0.130526 -0.118874   |

|    |    |   |           |           |           |
|----|----|---|-----------|-----------|-----------|
| 22 | 8  | 0 | 2.835723  | -0.777744 | -0.088174 |
| 23 | 6  | 0 | 5.216594  | -0.344382 | -0.224728 |
| 24 | 6  | 0 | 5.476306  | -1.726499 | -0.280592 |
| 25 | 6  | 0 | 6.286168  | 0.573066  | -0.266013 |
| 26 | 6  | 0 | 6.785356  | -2.192154 | -0.375545 |
| 27 | 1  | 0 | 4.650064  | -2.424359 | -0.248611 |
| 28 | 6  | 0 | 7.596816  | 0.118186  | -0.361300 |
| 29 | 1  | 0 | 6.079208  | 1.634347  | -0.222528 |
| 30 | 6  | 0 | 7.828832  | -1.261922 | -0.414654 |
| 31 | 1  | 0 | 7.002287  | -3.250523 | -0.418580 |
| 32 | 1  | 0 | 8.428876  | 0.807908  | -0.393582 |
| 33 | 7  | 0 | 9.200430  | -1.743978 | -0.513782 |
| 34 | 8  | 0 | 10.141004 | -0.894768 | -0.547036 |
| 35 | 8  | 0 | 9.402377  | -2.994438 | -0.563144 |
| 36 | 6  | 0 | -4.463671 | -0.527546 | -0.201629 |
| 37 | 7  | 0 | -4.486309 | -1.872631 | -0.174719 |
| 38 | 6  | 0 | -5.918716 | -0.002597 | -0.244574 |
| 39 | 6  | 0 | -5.818626 | -2.383927 | -0.199803 |
| 40 | 6  | 0 | -6.707536 | -1.306028 | -0.238523 |
| 41 | 6  | 0 | -8.078230 | -1.544238 | -0.264980 |
| 42 | 6  | 0 | -6.233870 | -3.713583 | -0.188702 |
| 43 | 1  | 0 | -5.533430 | -4.538835 | -0.161400 |
| 44 | 6  | 0 | -8.526991 | -2.875778 | -0.253108 |
| 45 | 6  | 0 | -7.616794 | -3.943737 | -0.216012 |
| 46 | 1  | 0 | -8.790997 | -0.727203 | -0.293966 |
| 47 | 1  | 0 | -9.591530 | -3.081046 | -0.273119 |
| 48 | 1  | 0 | -7.984693 | -4.963485 | -0.208308 |
| 49 | 6  | 0 | -6.269466 | 0.835580  | 1.019198  |
| 50 | 1  | 0 | -6.040562 | 0.279735  | 1.933134  |
| 51 | 1  | 0 | -5.727908 | 1.783531  | 1.044949  |
| 52 | 1  | 0 | -7.340922 | 1.057127  | 1.010575  |
| 53 | 6  | 0 | -6.212705 | 0.786340  | -1.553736 |
| 54 | 1  | 0 | -5.669192 | 1.732478  | -1.592758 |
| 55 | 1  | 0 | -5.945704 | 0.195686  | -2.434844 |
| 56 | 1  | 0 | -7.283048 | 1.008269  | -1.599836 |
| 57 | 8  | 0 | -0.384825 | 0.796203  | -0.116587 |
| 58 | 6  | 0 | -3.344236 | -2.797752 | -0.133597 |
| 59 | 1  | 0 | -3.305543 | -3.363550 | -1.068294 |
| 60 | 1  | 0 | -2.405752 | -2.269966 | 0.004452  |
| 61 | 1  | 0 | -3.481567 | -3.488485 | 0.701270  |
| 62 | 17 | 0 | 0.204339  | -2.333628 | 0.384259  |
| 63 | 24 | 0 | 1.121767  | -0.138330 | 0.406372  |
| 64 | 17 | 0 | 1.220412  | 0.274997  | 2.701878  |

**Table-1: Structural parameters of the SPNH –Cr complex (solvent ACN)**

| Bond                                | Distance (Å) | Angle                                                | Angle (°) | Dihedral Angle                                                      | Dihedral Angle |
|-------------------------------------|--------------|------------------------------------------------------|-----------|---------------------------------------------------------------------|----------------|
| Cr <sub>63</sub> – O <sub>22</sub>  | 1.89501      | Cl <sub>64</sub> –Cr <sub>63</sub> –O <sub>22</sub>  | 106.149   | O <sub>22</sub> -Cl <sub>62</sub> -O <sub>57</sub> -N <sub>19</sub> | -6.368         |
| Cr <sub>63</sub> – O <sub>57</sub>  | 1.84842      | Cl <sub>64</sub> –Cr <sub>63</sub> –O <sub>57</sub>  | 102.892   |                                                                     |                |
| Cr <sub>63</sub> – N <sub>19</sub>  | 2.03086      | Cl <sub>64</sub> –Cr <sub>63</sub> –Cl <sub>62</sub> | 100.882   |                                                                     |                |
| Cr <sub>63</sub> – Cl <sub>62</sub> | 2.37939      | Cl <sub>64</sub> –Cr <sub>63</sub> –N <sub>19</sub>  | 90.462    |                                                                     |                |
| Cr <sub>63</sub> – Cl <sub>64</sub> | 2.33451      | N <sub>19</sub> – Cr <sub>63</sub> –O <sub>22</sub>  | 77.195    |                                                                     |                |
|                                     |              | O <sub>22</sub> – Cr <sub>63</sub> –Cl <sub>62</sub> | 92.005    |                                                                     |                |
|                                     |              | Cl <sub>62</sub> –Cr <sub>63</sub> –O <sub>57</sub>  | 98.602    |                                                                     |                |
|                                     |              | O <sub>57</sub> -Cr <sub>63</sub> –N <sub>19</sub>   | 86.318    |                                                                     |                |

**Table-2: Observed UV-Visible absorption and computed absorption of SPNH and Cr-SPNH complex in acetonitrile and gas phase.**

|                         | Medium    | Experimental Absorption $\lambda_{\text{abs}}$ (nm) in acetonitrile/ water | TD-DFT vertical Excitation (nm) | f      | Experimental Emission (nm) | Emission (nm) |
|-------------------------|-----------|----------------------------------------------------------------------------|---------------------------------|--------|----------------------------|---------------|
| <b>SPNH</b>             | Gas Phase | 373                                                                        | 400                             | 0.0241 | 675                        | 694           |
|                         | ACN       |                                                                            | 351                             | 0.1003 |                            | 657           |
| <b>SPNH –Cr complex</b> | Gas Phase | 440                                                                        | 444                             | 0.2129 | 675                        | 640           |
|                         | ACN       |                                                                            | 448                             | 0.4548 |                            | ****          |

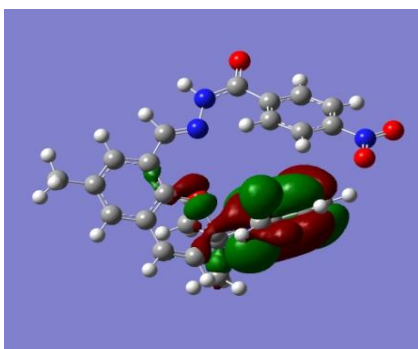

HOMO\_SPNH

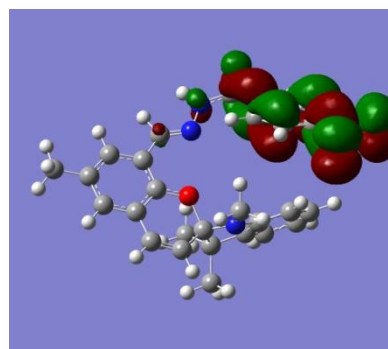

LUMO\_SPNH

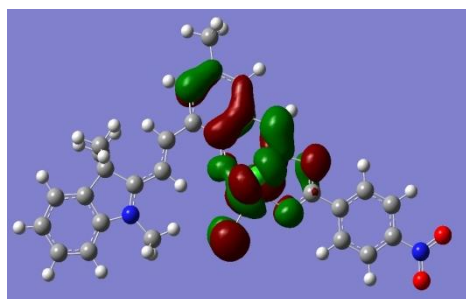

HOMO of SPNH-Cr\_complex

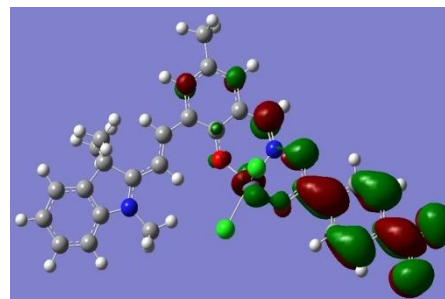

LUMO of SPNH-Cr\_Complex
